# Supplementary material
Source: PubMed Central journal article supplement (PMC5909764)
Supplement: blood817296-suppl1.pdf [file blood817296-suppl1.pdf]

## **Supplemental Appendix**

Supplement to: Koichi Takahashi and Boyu Hu, Feng Wang, Yuanqing Yan *et al.* Clinical Implications of Cancer Gene Mutations in Patients with Chronic Lymphocytic Leukemia Treated with Lenalidomide.

### **Contents**

**Supplemental Method**

**Supplemental Table S1**

**Supplemental Table S2**

**Supplemental Table S3**

**Supplemental Figure S1**

**Supplemental Figure S2**

**Supplemental References**

## Supplemental Method

### Targeted gene sequencing of CLL samples and detection of high-confidence driver mutations

Genomic DNA was extracted from diagnostic BM aspirate or PB samples using an Autopure extractor (QIAGEN/Gentra, Valencia, CA). DNAs were fragmented and bait-captured in solution as previously described according to manufacturer protocols [1]. Captured DNA libraries were then sequenced using a HiSeq 2000 sequencer (Illumina, San Diego, CA) with 76 basepair (bp) paired-end reads. Raw sequencing data from the Illumina platform were converted to a fastq format and aligned to the reference genome (hg19) using the Burroughs-Wheeler Aligner (BWA) [2]. The aligned BAM files were subjected to mark duplication, re-alignment, and re-calibration using Picard and GATK (<https://www.broadinstitute.org/gatk/guide/best-practices?bpm=DNaseq>). Preprocessed BAM files were then analyzed to detect single nucleotide variants (SNV) and small insertions and deletions (indels) using MuTect [3] and Pindel [4] algorithms, respectively, against virtual normal sequence developed in-house.

We modified an approach described by Pappaemanuil et al. to identify high-confidence driver mutations in the bone marrow samples without matched germline control [5]. First, variants with low quality supporting sequencing data were filtered out. Specifically, variants matching one or more of the following criteria were considered of low quality and therefore filtered out from further analysis: 1) tumor coverage < 15x and 20x for single nucleotide variants (SNVs) and insertions/deletions (indels), respectively, 2) tumor allele frequency < 5%, and 3) normal allele frequency  $\geq$  1% and 0% for SNVs and INDELS, respectively. Second, only variants which would introduce an obvious protein-coding change were kept for further analysis. Specifically, variant with an ANNOVAR annotation of non-synonymous, stop-gain, stop-loss, splicing, frameshift insertion, frameshift deletion, non-frameshift insertion or non-frameshift deletion was considered to be able to introduce an obvious protein-coding change and were therefore kept for further analysis. Third, common polymorphisms were removed to reduce the load of possible germline contamination due to the absence of matched normal. Specifically, a series of public variant database including the 1000 Genome Database (<http://www.1000genomes.org/>), ESP6500 Database (<http://evs.gs.washington.edu/EVS/>), dbSNP ver.132 ([https://www.ncbi.nlm.nih.gov/projects/SNP/snp\\_summary.cgi?build\\_id=132](https://www.ncbi.nlm.nih.gov/projects/SNP/snp_summary.cgi?build_id=132)), and Exome Aggregation Consortium database (<http://exac.broadinstitute.org/>), were utilized. Variant with a population frequency of 0.14% or more in any of the databases was considered possible germline polymorphism and was therefore removed from further analysis. Finally, hierarchical classification system was developed to assign confidence level for each remaining variant in order to facilitate the identification of putative driver mutations. Specifically, each variant was classified based on the following hierarchical order and was assigned a confidence level corresponding to its rank in the system: 1) Confirmed somatic mutation based on COSMIC database (version 72), 2) loss-of-function mutation such as splicing, stop-gain, stop-loss and frameshift mutation in known tumor suppressor genes, 3) recurrent variant which resides within three amino acids away from a confirmed somatic mutation according to COSMIC database (version 72), 4) variant which resides within three amino acids away from a confirmed somatic mutation according to COSMIC database (version 72), 5) variant which was predicted to be damaging by in-silico function prediction algorithms, and 6) variant with unknown significance. The first three groups were considered high-confidence tier while the remaining were considered of low-confidence. The final annotated variant list was passed out of the pipeline and was further analyzed by manual inspection and literature mining in order to identify high-confidence driver mutations.

**Table S1.** Various lenalidomide based protocols performed at MD Anderson Cancer Center from 2005-2014 and their respective patient enrollments.

| <b>Protocol</b>    | <b>Regimen</b>                          | <b>Treatment-naïve (n)</b> | <b>Relapsed/Refractory (n)</b> |
|--------------------|-----------------------------------------|----------------------------|--------------------------------|
| <b>NCT00267059</b> | <b>Lenalidomide</b>                     | <b>-</b>                   | <b>46</b>                      |
| <b>NCT00535873</b> | <b>Lenalidomide</b>                     | <b>46</b>                  | <b>-</b>                       |
| <b>NCT00759603</b> | <b>Lenalidomide plus<br/>Rituximab</b>  | <b>-</b>                   | <b>55</b>                      |
| <b>NCT01446133</b> | <b>Lenalidomide plus<br/>Rituximab</b>  | <b>56</b>                  | <b>53</b>                      |
| <b>NCT01002755</b> | <b>Lenalidomide plus<br/>Ofatumumab</b> | <b>-</b>                   | <b>32</b>                      |

**Table S2.** List of 295 genes targeted by next generation sequencing.

| Gene name        |               |                |                  |                  |                |                 |                |                |                     |
|------------------|---------------|----------------|------------------|------------------|----------------|-----------------|----------------|----------------|---------------------|
| <i>ABCC9</i>     | <i>CALR</i>   | <i>CUL5</i>    | <i>FANCD2</i>    | <i>HIST1H2BF</i> | <i>LEF1</i>    | <i>NBN</i>      | <i>PLA2G2D</i> | <i>SF3B1</i>   | <i>TINF2 (TIN2)</i> |
| <i>ABL1</i>      | <i>CARD11</i> | <i>CUX1</i>    | <i>FANCE</i>     | <i>HIST1H3D</i>  | <i>LRP1B</i>   | <i>NCOR1</i>    | <i>PLCG2</i>   | <i>SFRS1</i>   | <i>TLR2</i>         |
| <i>ACTG1</i>     | <i>CBL</i>    | <i>CYLD</i>    | <i>FANCG</i>     | <i>HIST1H4D</i>  | <i>LTB</i>     | <i>NCOR2</i>    | <i>POT1</i>    | <i>SFRS7</i>   | <i>TLR9</i>         |
| <i>AKT1</i>      | <i>CBLB</i>   | <i>DAXX</i>    | <i>FANCI</i>     | <i>HNRNPK</i>    | <i>LUC7L2</i>  | <i>NF1</i>      | <i>POU2AF1</i> | <i>SGK1</i>    | <i>TNFAIP3</i>      |
| <i>ANKRD11</i>   | <i>CCND1</i>  | <i>DCLRE1C</i> | <i>FANCL</i>     | <i>HRAS</i>      | <i>LYN</i>     | <i>NFE2</i>     | <i>PRDM1</i>   | <i>SH2B3</i>   | <i>TNFRSF14</i>     |
| <i>ARID1A</i>    | <i>CCND3</i>  | <i>DDX3X</i>   | <i>FAS</i>       | <i>ICOS</i>      | <i>MALT1</i>   | <i>NFKB1</i>    | <i>PRKCB</i>   | <i>SHH</i>     | <i>TNKS</i>         |
| <i>ARID1B</i>    | <i>CD200</i>  | <i>DIS3</i>    | <i>FAT1</i>      | <i>ID3</i>       | <i>MAP2K1</i>  | <i>NFKB2</i>    | <i>PTEN</i>    | <i>SMAD2</i>   | <i>TOX</i>          |
| <i>ARID2</i>     | <i>CD274</i>  | <i>DKC1</i>    | <i>FAT3</i>      | <i>IDH1</i>      | <i>MAPK1</i>   | <i>NFKBIA</i>   | <i>PTPN1</i>   | <i>SMC1A</i>   | <i>TP53</i>         |
| <i>ARID5B</i>    | <i>CD58</i>   | <i>DLC1</i>    | <i>FBXW7</i>     | <i>IDH2</i>      | <i>MAX</i>     | <i>NFKBIE</i>   | <i>PTPN11</i>  | <i>SMC3</i>    | <i>TRAF3</i>        |
| <i>ARPP21</i>    | <i>CD79A</i>  | <i>DNM2</i>    | <i>FGFR3</i>     | <i>IKBKA</i>     | <i>MDM2</i>    | <i>NOTCH1</i>   | <i>RAD21</i>   | <i>SMC5</i>    | <i>TRAF6</i>        |
| <i>ASXL1</i>     | <i>CD79B</i>  | <i>DNMT1</i>   | <i>FLI1</i>      | <i>IKZF1</i>     | <i>MED12</i>   | <i>NOTCH2</i>   | <i>RAD51C</i>  | <i>SNX7</i>    | <i>TYK2</i>         |
| <i>ATF7IP</i>    | <i>CDK4</i>   | <i>DNMT3A</i>  | <i>FLT3</i>      | <i>IKZF2</i>     | <i>MEF2B</i>   | <i>NPM1</i>     | <i>RAG1</i>    | <i>SOCS1</i>   | <i>TYK3</i>         |
| <i>ATM</i>       | <i>CDKN2A</i> | <i>DNMT3B</i>  | <i>FNDC3A</i>    | <i>IKZF3</i>     | <i>MEF2C</i>   | <i>NR3C2</i>    | <i>RAG2</i>    | <i>SOX5</i>    | <i>U2AF1</i>        |
| <i>ATRX</i>      | <i>CDKN2B</i> | <i>EBF1</i>    | <i>FOXP1</i>     | <i>IL7R</i>      | <i>MGA</i>     | <i>NRAS</i>     | <i>RASA2</i>   | <i>SP140</i>   | <i>U2AF2</i>        |
| <i>B2M</i>       | <i>CDKN2C</i> | <i>ECT2L</i>   | <i>FYN</i>       | <i>IRAK1</i>     | <i>miR125a</i> | <i>NSD2</i>     | <i>RB1</i>     | <i>SPEN</i>    | <i>UBR5</i>         |
| <i>BCL10</i>     | <i>CEBPA</i>  | <i>EED</i>     | <i>G6PC3</i>     | <i>IRAK4</i>     | <i>miR-142</i> | <i>NT5C2</i>    | <i>REL</i>     | <i>SPIB</i>    | <i>USP29</i>        |
| <i>BCL2</i>      | <i>CEBPE</i>  | <i>EGR1</i>    | <i>GAB2</i>      | <i>IRF1</i>      | <i>miR155</i>  | <i>PAG1</i>     | <i>RELA</i>    | <i>SRSF2</i>   | <i>VPREB1</i>       |
| <i>BCL6</i>      | <i>CHD2</i>   | <i>EGR2</i>    | <i>GATA1</i>     | <i>IRF4</i>      | <i>miR15a</i>  | <i>PALB2</i>    | <i>RELB</i>    | <i>STAG1</i>   | <i>WHSC1</i>        |
| <i>BCL7A</i>     | <i>CHK2</i>   | <i>ELANE</i>   | <i>GATA2</i>     | <i>IRF7</i>      | <i>miR16-1</i> | <i>PAX5</i>     | <i>RELN</i>    | <i>STAG2</i>   | <i>WHSC1L1</i>      |
| <i>BCOR</i>      | <i>CIITA</i>  | <i>EP300</i>   | <i>GATA3</i>     | <i>ITPKB</i>     | <i>MIR17HG</i> | <i>PDCD1</i>    | <i>RHOA</i>    | <i>STAT1</i>   | <i>WT1</i>          |
| <i>BCR</i>       | <i>CNOT3</i>  | <i>EPHA7</i>   | <i>GCET2</i>     | <i>JAK1</i>      | <i>miR21</i>   | <i>PDCD1LG2</i> | <i>RIPK1</i>   | <i>STAT3</i>   | <i>XPO1</i>         |
| <i>BIRC3</i>     | <i>CREBBP</i> | <i>EPOR</i>    | <i>GF11B</i>     | <i>JAK2</i>      | <i>mir34b</i>  | <i>PDGFRB</i>   | <i>ROBO1</i>   | <i>SUZ12</i>   | <i>ZAP70</i>        |
| <i>BLK</i>       | <i>CRLF2</i>  | <i>ERG</i>     | <i>GNA13</i>     | <i>JAK3</i>      | <i>mir34c</i>  | <i>PEG3</i>     | <i>ROR1</i>    | <i>SYK</i>     | <i>ZMYM2</i>        |
| <i>BM11</i>      | <i>CSF2RA</i> | <i>ETV6</i>    | <i>GNAS</i>      | <i>JARID2</i>    | <i>MLL</i>     | <i>PHF6</i>     | <i>RPL10</i>   | <i>TBL1XR1</i> | <i>ZMYM3</i>        |
| <i>BRAF</i>      | <i>CSF3R</i>  | <i>EZH2</i>    | <i>GNB1</i>      | <i>KDM4C</i>     | <i>MLL2</i>    | <i>PHIP</i>     | <i>RPL5</i>    | <i>TCF3</i>    | <i>ZRSR2</i>        |
| <i>BRIP1</i>     | <i>CTBP1</i>  | <i>FAM46C</i>  | <i>GPRC5A</i>    | <i>KDM6A</i>     | <i>MLL3</i>    | <i>PIGA</i>     | <i>RUNX1</i>   | <i>TERC</i>    |                     |
| <i>BTG1</i>      | <i>CTBP2</i>  | <i>FAM5C</i>   | <i>HAX1</i>      | <i>KIT</i>       | <i>MPL</i>     | <i>PIK3CA</i>   | <i>RUNX2</i>   | <i>TERT</i>    |                     |
| <i>BTK</i>       | <i>CTCF</i>   | <i>FANCA</i>   | <i>HIST1H1E</i>  | <i>KLHL6</i>     | <i>MS4A1</i>   | <i>PIK3CB</i>   | <i>SAMHD1</i>  | <i>TET1</i>    |                     |
| <i>BTLA</i>      | <i>CTLA4</i>  | <i>FANCB</i>   | <i>HIST1H2AD</i> | <i>KRAS</i>      | <i>MYB</i>     | <i>PIK3CG</i>   | <i>SETBP1</i>  | <i>TET2</i>    |                     |
| <i>C22orf194</i> | <i>CTNNA1</i> | <i>FANCC</i>   | <i>HIST1H2BE</i> | <i>LAMB4</i>     | <i>MYD88</i>   | <i>PIK3R1</i>   | <i>SETD2</i>   | <i>TGDS</i>    |                     |

**Table S3.** List of all mutations detected.

| <b>Mutation Class</b> | <b>Gene</b>   | <b>Transcript ID</b> | <b>Nucleotide change</b>                                  | <b>AA change</b> |
|-----------------------|---------------|----------------------|-----------------------------------------------------------|------------------|
| exonic                | <i>ARID1A</i> | uc001bmv.1           | c.6746delC                                                | p.S2249X         |
| exonic                | <i>ARID1A</i> | uc001bmv.1           | c.6094_6095insAAAAGGAGGAGGAACAGGACCAAGGGGTGAGCTGCAACAAAGT | p.E2032fs        |
| exonic                | <i>ARID1A</i> | uc001bmt.1           | c.2320_2327del                                            | p.774_776del     |
| exonic                | <i>ASXLI</i>  | uc021wbw.1           | c.C2616A                                                  | p.C872X          |
| exonic                | <i>ASXLI</i>  | uc021wbw.1           | c.2523delA                                                | p.V841fs         |
| exonic                | <i>ASXLI</i>  | uc021wbw.1           | c.2449_2450insT                                           | p.L817fs         |
| exonic                | <i>ASXLI</i>  | uc021wbw.1           | c.2171delT                                                | p.L724fs         |
| exonic                | <i>ASXLI</i>  | uc021wbw.1           | c.2556_2557insC                                           | p.S852fs         |
| exonic                | <i>ASXLI</i>  | uc021wbw.1           | c.2849_2850insA                                           | p.L950fs         |
| exonic                | <i>ASXLI</i>  | uc021wbw.1           | c.2569_2570insA                                           | p.L857fs         |
| exonic                | <i>ATM</i>    | uc001pkb.1           | c.T7309G                                                  | p.Y2437D         |
| exonic                | <i>ATM</i>    | uc001pkb.1           | c.G8672A                                                  | p.G2891D         |
| exonic                | <i>ATM</i>    | uc001pkb.1           | c.G8151C                                                  | p.K2717N         |
| exonic                | <i>ATM</i>    | uc001pkb.1           | c.G9023A                                                  | p.R3008H         |
| exonic                | <i>ATM</i>    | uc001pkb.1           | c.C103T                                                   | p.R35X           |
| exonic                | <i>ATM</i>    | uc001pkb.1           | c.C8494T                                                  | p.R2832C         |
| exonic                | <i>ATM</i>    | uc001pkb.1           | c.G7267A                                                  | p.E2423K         |
| exonic                | <i>ATM</i>    | uc001pkb.1           | c.G7267A                                                  | p.E2423K         |
| exonic                | <i>ATM</i>    | uc001pkb.1           | c.A2314T                                                  | p.R772X          |
| exonic                | <i>ATM</i>    | uc001pkb.1           | c.C1120T                                                  | p.Q374X          |
| exonic                | <i>ATM</i>    | uc001pkb.1           | c.C7194A                                                  | p.Y2398X         |
| splicing              | <i>ATM</i>    |                      | Chr11:108143335,G>T                                       |                  |
| splicing              | <i>ATM</i>    |                      | Chr11:108188249,G>T                                       |                  |
| exonic                | <i>ATM</i>    | uc001pkb.1           | c.C8525T                                                  | p.P2842L         |
| exonic                | <i>ATM</i>    | uc001pkb.1           | c.A1G                                                     | p.M1V            |
| exonic                | <i>ATM</i>    | uc001pkb.1           | c.T9032A                                                  | p.M3011K         |
| splicing              | <i>ATM</i>    |                      | Chr11:108168110,G>C                                       |                  |
| exonic                | <i>ATM</i>    | uc001pkb.1           | c.G667T                                                   | p.E223X          |
| exonic                | <i>ATM</i>    | uc001pkb.1           | c.880delG                                                 | p.G294fs         |
| exonic                | <i>ATM</i>    | uc001pkb.1           | c.5599delC                                                | p.Q1867fs        |
| exonic                | <i>ATM</i>    | uc001pkb.1           | c.1875_1876del                                            | p.625_626del     |
| exonic                | <i>ATM</i>    | uc001pkb.1           | c.4096_4097del                                            | p.1366_1366del   |
| exonic                | <i>ATM</i>    | uc001pkb.1           | c.361_362insTG                                            | p.L121fs         |
| exonic                | <i>ATM</i>    | uc001pkb.1           | c.477_481del                                              | p.159_161del     |
| splicing              | <i>ATM</i>    |                      | Chr11:108124536,TTGAAG>T                                  |                  |
| exonic                | <i>ATM</i>    | uc001pkb.1           | c.838_842del                                              | p.280_281del     |
| exonic                | <i>ATM</i>    | uc001pkb.1           | c.4638_4641del                                            | p.1546_1547del   |
| exonic                | <i>ATM</i>    | uc001pkb.1           | c.2282_2283del                                            | p.761_761del     |
| exonic                | <i>ATM</i>    | uc001pkb.1           | c.580_581insT                                             | p.V194fs         |
| exonic                | <i>ATM</i>    | uc001pkb.1           | c.7308delA                                                | p.R2436fs        |
| exonic                | <i>BCL2</i>   | uc002liu.1           | c.C256T                                                   | p.L86F           |
| exonic                | <i>BCL2</i>   | uc002liu.1           | c.C157T                                                   | p.P53S           |
| exonic                | <i>BCOR</i>   | uc004dem.4           | c.2443_2444insT                                           | p.A815fs         |
| exonic                | <i>BCOR</i>   | uc004dem.4           | c.3311delA                                                | p.K1104fs        |

|          |              |            |                                          |                |
|----------|--------------|------------|------------------------------------------|----------------|
| exonic   | <i>BCOR</i>  | uc004dem.4 | c.3088_3089del                           | p.1030_1030del |
| exonic   | <i>BCOR</i>  | uc004den.4 | c.4140_4141del                           | p.1380_1381del |
| exonic   | <i>BCOR</i>  | uc004den.4 | c.4140_4141del                           | p.1380_1381del |
| exonic   | <i>BCOR</i>  | uc004dem.4 | c.433_434del                             | p.145_145del   |
| exonic   | <i>BCOR</i>  | uc004dem.4 | c.3090_3093del                           | p.1030_1031del |
| exonic   | <i>BCOR</i>  | uc004dem.4 | c.264_277del                             | p.88_93del     |
| exonic   | <i>BCOR</i>  | uc004den.4 | c.4097_4100del                           | p.1366_1367del |
| exonic   | <i>BIRC3</i> | uc001pgx.3 | c.T1754G                                 | p.L585X        |
| exonic   | <i>BIRC3</i> | uc001pgx.3 | c.T1337G                                 | p.L446X        |
| exonic   | <i>BIRC3</i> | uc001pgx.3 | c.1639delC                               | p.Q547fs       |
| exonic   | <i>BIRC3</i> | uc001pgx.3 | c.1639delC                               | p.Q547fs       |
| exonic   | <i>BIRC3</i> | uc001pgx.3 | c.1320_1321insT                          | p.E440fs       |
| exonic   | <i>BIRC3</i> | uc001pgx.3 | c.1639delC                               | p.Q547fs       |
| exonic   | <i>BIRC3</i> | uc001pgx.3 | c.1639delC                               | p.Q547fs       |
| exonic   | <i>BIRC3</i> | uc001pgx.3 | c.1639delC                               | p.Q547fs       |
| exonic   | <i>BIRC3</i> | uc001pgx.3 | c.1639delC                               | p.Q547fs       |
| exonic   | <i>BIRC3</i> | uc001pgx.3 | c.1639delC                               | p.Q547fs       |
| exonic   | <i>BIRC3</i> | uc001pgx.3 | c.1642delT                               | p.L548fs       |
| exonic   | <i>BIRC3</i> | uc001pgx.3 | c.1276_1277insA                          | p.E426fs       |
| exonic   | <i>BIRC3</i> | uc001pgx.3 | c.1641_1642insT                          | p.Q547fs       |
| exonic   | <i>BIRC3</i> | uc001pgx.3 | c.1290_1291insGA                         | p.E430fs       |
| exonic   | <i>BIRC3</i> | uc001pgx.3 | c.1318_1319insAATC                       | p.E440fs       |
| exonic   | <i>BIRC3</i> | uc001pgx.3 | c.1281_1288del                           | p.427_430del   |
| exonic   | <i>BIRC3</i> | uc001pgx.3 | c.1262_1263insCAATGCAGAAGATGAAATAAGGGAAG | p.L421fs       |
| exonic   | <i>BIRC3</i> | uc001pgx.3 | c.1291_1292insA                          | p.E431fs       |
| exonic   | <i>BIRC3</i> | uc001pgx.3 | c.1639delC                               | p.Q547fs       |
| exonic   | <i>BIRC3</i> | uc001pgx.3 | c.1138delC                               | p.P380fs       |
| exonic   | <i>BRAF</i>  | uc003vwc.4 | c.T1790A                                 | p.L597Q        |
| exonic   | <i>BRAF</i>  | uc003vwc.4 | c.A1803T                                 | p.K601N        |
| exonic   | <i>BRAF</i>  | uc003vwc.4 | c.G1406C                                 | p.G469A        |
| exonic   | <i>BRAF</i>  | uc003vwc.4 | c.A1803C                                 | p.K601N        |
| exonic   | <i>BRAF</i>  | uc003vwc.4 | c.T1790A                                 | p.L597Q        |
| exonic   | <i>BRAF</i>  | uc003vwc.4 | c.A1801G                                 | p.K601E        |
| exonic   | <i>BRCC3</i> | uc004fna.3 | c.G637T                                  | p.E213X        |
| exonic   | <i>BRCC3</i> | uc004fna.3 | c.C10T                                   | p.Q4X          |
| exonic   | <i>BRCC3</i> | uc011mzy.2 | c.C519A                                  | p.C173X        |
| exonic   | <i>BRCC3</i> | uc011mzy.2 | c.256delA                                | p.K86fs        |
| exonic   | <i>BRCC3</i> | uc011mzy.2 | c.456delA                                | p.G152fs       |
| splicing | <i>BRCC3</i> |            | ChrX:154305565,GAT>G                     |                |
| exonic   | <i>BRCC3</i> | uc004fna.3 | c.782_783insGG                           | p.K261fs       |
| exonic   | <i>BRCC3</i> | uc011mzy.2 | c.183_195del                             | p.61_65del     |
| exonic   | <i>BRCC3</i> | uc004fna.3 | c.76_95del                               | p.26_32del     |
| exonic   | <i>CD79B</i> | uc002jdp.1 | c.T624G                                  | p.Y208X        |
| exonic   | <i>CHD2</i>  | uc002bso.1 | c.T2378A                                 | p.L793X        |
| exonic   | <i>CHD2</i>  | uc010urb.2 | c.134_135insTG                           | p.D45fs        |
| exonic   | <i>CHD2</i>  | uc002bso.1 | c.4165_4168del                           | p.1389_1390del |
| splicing | <i>CHEK2</i> |            | Chr22:29121230,C>T                       |                |

|          |               |            |                       |                |
|----------|---------------|------------|-----------------------|----------------|
| exonic   | <i>CHEK2</i>  | uc003adt.1 | c.C1140A              | p.Y380X        |
| exonic   | <i>CHEK2</i>  | uc003adt.1 | c.720delA             | p.K240fs       |
| exonic   | <i>CNOT3</i>  | uc002qdk.2 | c.G58A                | p.E20K         |
| exonic   | <i>CNOT3</i>  | uc002qdk.2 | c.G58A                | p.E20K         |
| splicing | <i>CREBBP</i> |            | Chr16:3789726,C>T     |                |
| exonic   | <i>CREBBP</i> | uc002cvv.3 | c.C3436T              | p.Q1146X       |
| exonic   | <i>CREBBP</i> | uc002cvv.3 | c.2400delG            | p.P800fs       |
| exonic   | <i>CREBBP</i> | uc002cvv.3 | c.3469_3475del        | p.1157_1159del |
| exonic   | <i>DDX3X</i>  | uc004dfe.3 | c.C1582T              | p.R528C        |
| splicing | <i>DDX3X</i>  |            | ChrX:41204656,G>C     |                |
| exonic   | <i>DDX3X</i>  | uc004dfe.3 | c.A652T               | p.R218X        |
| exonic   | <i>DDX3X</i>  | uc004dfe.3 | c.C43T                | p.Q15X         |
| exonic   | <i>DDX3X</i>  | uc004dfe.3 | c.1470delA            | p.G490fs       |
| splicing | <i>DDX3X</i>  |            | ChrX:41204428,TGACA>T |                |
| splicing | <i>DIS3</i>   |            | Chr13:73342922,C>A    |                |
| exonic   | <i>DIS3</i>   | uc001vix.4 | c.C2065T              | p.R689X        |
| exonic   | <i>DLC1</i>   | uc003wvm.2 | c.C1049T              | p.A350V        |
| exonic   | <i>DNMT3A</i> | uc002rgc.3 | c.T2578C              | p.W860R        |
| splicing | <i>DNMT3A</i> |            | Chr2:25468121,C>T     |                |
| exonic   | <i>DNMT3A</i> | uc002rgc.3 | c.G2384A              | p.W795X        |
| exonic   | <i>DNMT3A</i> | uc002rgc.3 | c.C2206T              | p.R736C        |
| exonic   | <i>DNMT3A</i> | uc002rgc.3 | c.G2645A              | p.R882H        |
| exonic   | <i>DNMT3A</i> | uc002rgc.3 | c.G2645A              | p.R882H        |
| splicing | <i>DNMT3A</i> |            | Chr2:25467408,C>T     |                |
| splicing | <i>DNMT3A</i> |            | Chr2:25467407,A>G     |                |
| exonic   | <i>DNMT3A</i> | uc002rgc.3 | c.C1988A              | p.S663X        |
| exonic   | <i>EGR2</i>   | uc010qio.2 | c.C1189A              | p.H397N        |
| exonic   | <i>EGR2</i>   | uc010qio.2 | c.G1105A              | p.E369K        |
| exonic   | <i>EGR2</i>   | uc010qio.2 | c.C1189A              | p.H397N        |
| exonic   | <i>EGR2</i>   | uc010qio.2 | c.G1105A              | p.E369K        |
| exonic   | <i>EGR2</i>   | uc010qio.2 | c.G1270C              | p.D424H        |
| exonic   | <i>EGR2</i>   | uc010qio.2 | c.G1270C              | p.D424H        |
| exonic   | <i>EGR2</i>   | uc010qio.2 | c.G1105A              | p.E369K        |
| exonic   | <i>EGR2</i>   | uc010qio.2 | c.A295T               | p.R99X         |
| exonic   | <i>EGR2</i>   | uc010qio.2 | c.C1189A              | p.H397N        |
| exonic   | <i>EGR2</i>   | uc010qio.2 | c.C1189A              | p.H397N        |
| exonic   | <i>EGR2</i>   | uc010qio.2 | c.G1105A              | p.E369K        |
| exonic   | <i>EGR2</i>   | uc010qio.2 | c.C1189A              | p.H397N        |
| exonic   | <i>EGR2</i>   | uc010qio.2 | c.C1189A              | p.H397N        |
| exonic   | <i>EGR2</i>   | uc010qio.2 | c.G1105A              | p.E369K        |
| exonic   | <i>EGR2</i>   | uc010qio.2 | c.G1105A              | p.E369K        |
| exonic   | <i>EP300</i>  | uc003azl.4 | c.A5711C              | p.Q1904P       |
| exonic   | <i>EZH2</i>   | uc003wfb.2 | c.A965G               | p.N322S        |
| exonic   | <i>FAT1</i>   | uc003izf.3 | c.G9358A              | p.D3120N       |
| exonic   | <i>FAT1</i>   | uc003izf.3 | c.C6512T              | p.P2171L       |
| exonic   | <i>FBXW7</i>  | uc003ims.3 | c.C1393T              | p.R465C        |

|          |                      |            |                               |            |
|----------|----------------------|------------|-------------------------------|------------|
| exonic   | <i>FBXW7</i>         | uc003ims.3 | c.A1136G                      | p.H379R    |
| exonic   | <i>FBXW7</i>         | uc003ims.3 | c.G1514T                      | p.R505L    |
| exonic   | <i>FBXW7</i>         | uc003ims.3 | c.G1310T                      | p.G437V    |
| exonic   | <i>FBXW7</i>         | uc003ims.3 | c.C1177T                      | p.R393X    |
| exonic   | <i>FBXW7</i>         | uc003ims.3 | c.C1072T                      | p.Q358X    |
| exonic   | <i>FBXW7</i>         | uc003ims.3 | c.G1818A                      | p.W606X    |
| exonic   | <i>GNB1</i>          | uc001aif.3 | c.T239C                       | p.I80T     |
| exonic   | <i>HIST1H1<br/>E</i> | uc003ngq.3 | c.G236A                       | p.R79H     |
| exonic   | <i>HIST1H1<br/>E</i> | uc003ngq.3 | c.C491T                       | p.A164V    |
| exonic   | <i>ID3</i>           | uc001bhh.4 | c.C190T                       | p.L64F     |
| exonic   | <i>ID3</i>           | uc001bhh.4 | c.191_195del                  | p.64_65del |
| exonic   | <i>IKBKB</i>         | uc003xov.3 | c.A512G                       | p.K171R    |
| exonic   | <i>IKBKB</i>         | uc011lcq.2 | c.9_10insG                    | p.S3fs     |
| exonic   | <i>IKZF3</i>         | uc002hsu.3 | c.T485G                       | p.L162R    |
| exonic   | <i>IKZF3</i>         | uc002hsu.3 | c.T485G                       | p.L162R    |
| exonic   | <i>IKZF3</i>         | uc002hsu.3 | c.T485G                       | p.L162R    |
| exonic   | <i>IKZF3</i>         | uc002hsu.3 | c.T485G                       | p.L162R    |
| exonic   | <i>IKZF3</i>         | uc002hsu.3 | c.T485G                       | p.L162R    |
| exonic   | <i>IKZF3</i>         | uc002hsu.3 | c.T485G                       | p.L162R    |
| exonic   | <i>IKZF3</i>         | uc002hsu.3 | c.T485G                       | p.L162R    |
| exonic   | <i>IRF4</i>          | uc003msz.4 | c.C342A                       | p.S114R    |
| splicing | <i>IRF4</i>          |            | Chr6:393099,TGCAGAGCAGAGCGG>T |            |
| exonic   | <i>ITPKB</i>         | uc001hqh.3 | c.G868A                       | p.A290T    |
| exonic   | <i>KDM6A</i>         | uc011mkz.2 | c.G3813A                      | p.W1271X   |
| exonic   | <i>KRAS</i>          | uc001rgp.1 | c.G34A                        | p.G12S     |
| exonic   | <i>KRAS</i>          | uc001rgp.1 | c.G38A                        | p.G13D     |
| exonic   | <i>KRAS</i>          | uc001rgp.1 | c.G38A                        | p.G13D     |
| exonic   | <i>KRAS</i>          | uc001rgp.1 | c.A183C                       | p.Q61H     |
| exonic   | <i>KRAS</i>          | uc001rgp.1 | c.G35A                        | p.G12D     |
| exonic   | <i>KRAS</i>          | uc001rgp.1 | c.C64A                        | p.Q22K     |
| exonic   | <i>KRAS</i>          | uc001rgp.1 | c.G35A                        | p.G12D     |
| exonic   | <i>KRAS</i>          | uc001rgp.1 | c.G35A                        | p.G12D     |
| exonic   | <i>KRAS</i>          | uc001rgp.1 | c.G34T                        | p.G12C     |
| exonic   | <i>KRAS</i>          | uc001rgp.1 | c.A351T                       | p.K117N    |
| splicing | <i>LTB</i>           |            | Chr6:31549335,C>T             |            |
| exonic   | <i>LTB</i>           | uc003nul.3 | c.C206T                       | p.A69V     |
| exonic   | <i>MAP2K1</i>        | uc010bhq.3 | c.G607A                       | p.E203K    |
| exonic   | <i>MED12</i>         | uc004dyy.3 | c.G97A                        | p.E33K     |
| exonic   | <i>MED12</i>         | uc004dyy.3 | c.G131A                       | p.G44D     |
| exonic   | <i>MED12</i>         | uc004dyy.3 | c.G97A                        | p.E33K     |
| exonic   | <i>MED12</i>         | uc004dyy.3 | c.T107G                       | p.L36R     |
| exonic   | <i>MED12</i>         | uc004dyy.3 | c.G131C                       | p.G44A     |
| exonic   | <i>MED12</i>         | uc004dyy.3 | c.G97A                        | p.E33K     |
| exonic   | <i>MED12</i>         | uc004dyy.3 | c.T107G                       | p.L36R     |
| exonic   | <i>MED12</i>         | uc004dyy.3 | c.G130A                       | p.G44S     |



|          |               |            |                    |                |
|----------|---------------|------------|--------------------|----------------|
| exonic   | <i>MED12</i>  | uc004dyy.3 | c.G97A             | p.E33K         |
| exonic   | <i>MED12</i>  | uc004dyy.3 | c.G130C            | p.G44R         |
| exonic   | <i>MED12</i>  | uc004dyy.3 | c.G130A            | p.G44S         |
| exonic   | <i>MED12</i>  | uc004dyy.3 | c.95_97del         | p.32_33del     |
| exonic   | <i>MGA</i>    | uc010ucy.2 | c.G4032A           | p.W1344X       |
| splicing | <i>MGA</i>    |            | Chr15:42052728,G>T |                |
| exonic   | <i>MGA</i>    | uc001zog.1 | c.C2566T           | p.Q856X        |
| exonic   | <i>MGA</i>    | uc010ucy.2 | c.G7307A           | p.R2436H       |
| exonic   | <i>MGA</i>    | uc001zog.1 | c.A1918T           | p.K640X        |
| splicing | <i>MGA</i>    |            | Chr15:42005696,T>C |                |
| exonic   | <i>MGA</i>    | uc001zog.1 | c.T581A            | p.L194X        |
| exonic   | <i>MGA</i>    | uc001zog.1 | c.C2009A           | p.S670X        |
| exonic   | <i>MGA</i>    | uc010ucy.2 | c.C7450T           | p.Q2484X       |
| exonic   | <i>MGA</i>    | uc010ucy.2 | c.6857delA         | p.E2286fs      |
| exonic   | <i>MGA</i>    | uc001zog.1 | c.552_553insA      | p.N184fs       |
| exonic   | <i>MGA</i>    | uc001zog.1 | c.2666_2667insT    | p.H889fs       |
| exonic   | <i>MGA</i>    | uc001zog.1 | c.2457delT         | p.R819fs       |
| exonic   | <i>MGA</i>    | uc001zog.1 | c.2678_2679del     | p.893_893del   |
| exonic   | <i>MGA</i>    | uc010ucy.2 | c.4065_4069del     | p.1355_1357del |
| exonic   | <i>MLL2</i>   | uc001rta.4 | c.C12844T          | p.R4282X       |
| exonic   | <i>MLL2</i>   | uc001rta.4 | c.C1029G           | p.Y343X        |
| exonic   | <i>MLL3</i>   | uc003wla.3 | c.C5371T           | p.Q1791X       |
| exonic   | <i>MLL3</i>   | uc003wla.3 | c.6159_6160del     | p.2053_2054del |
| exonic   | <i>MYD88</i>  | uc011ayj.2 | c.T613C            | p.X205R        |
| exonic   | <i>MYD88</i>  | uc003chx.3 | c.G649T            | p.V217F        |
| exonic   | <i>MYD88</i>  | uc003chx.3 | c.G649T            | p.V217F        |
| exonic   | <i>MYD88</i>  | uc011ayj.2 | c.T613C            | p.X205R        |
| exonic   | <i>MYD88</i>  | uc003chx.3 | c.G649T            | p.V217F        |
| exonic   | <i>MYD88</i>  | uc003chx.3 | c.C656G            | p.S219C        |
| exonic   | <i>MYD88</i>  | uc003chx.3 | c.C656G            | p.S219C        |
| exonic   | <i>MYD88</i>  | uc011ayj.2 | c.T613C            | p.X205R        |
| exonic   | <i>NFKBIE</i> | uc003oxe.1 | c.C887T            | p.T296I        |
| exonic   | <i>NFKBIE</i> | uc003oxe.1 | c.C782T            | p.T261M        |
| exonic   | <i>NFKBIE</i> | uc003oxe.1 | c.677delG          | p.G226fs       |
| exonic   | <i>NFKBIE</i> | uc003oxe.1 | c.1270_1271insATG  | p.L424delinsML |
| exonic   | <i>NFKBIE</i> | uc003oxe.1 | c.759_762del       | p.253_254del   |
| exonic   | <i>NFKBIE</i> | uc003oxe.1 | c.759_762del       | p.253_254del   |
| exonic   | <i>NFKBIE</i> | uc003oxe.1 | c.759_762del       | p.253_254del   |
| exonic   | <i>NFKBIE</i> | uc003oxe.1 | c.759_762del       | p.253_254del   |
| exonic   | <i>NFKBIE</i> | uc003oxe.1 | c.759_762del       | p.253_254del   |
| exonic   | <i>NFKBIE</i> | uc003oxe.1 | c.759_762del       | p.253_254del   |
| exonic   | <i>NFKBIE</i> | uc003oxe.1 | c.759_762del       | p.253_254del   |
| exonic   | <i>NFKBIE</i> | uc003oxe.1 | c.759_762del       | p.253_254del   |
| exonic   | <i>NFKBIE</i> | uc003oxe.1 | c.759_762del       | p.253_254del   |
| exonic   | <i>NFKBIE</i> | uc003oxe.1 | c.759_762del       | p.253_254del   |
| exonic   | <i>NFKBIE</i> | uc003oxe.1 | c.819_825del       | p.273_275del   |



|          |               |            |                    |                |
|----------|---------------|------------|--------------------|----------------|
| splicing | <i>PAX5</i>   |            | Chr9:37033981,A>T  |                |
| exonic   | <i>POT1</i>   | uc003vlm.3 | c.T126G            | p.D42E         |
| exonic   | <i>POT1</i>   | uc003vlm.3 | c.A281G            | p.Q94R         |
| splicing | <i>POT1</i>   |            | Chr7:124537267,C>A |                |
| exonic   | <i>POT1</i>   | uc003vlm.3 | c.A797T            | p.H266L        |
| exonic   | <i>POT1</i>   | uc003vlm.3 | c.1072_1073insT    | p.Q358fs       |
| exonic   | <i>POT1</i>   | uc003vlm.3 | c.1300_1301insA    | p.V434fs       |
| exonic   | <i>POT1</i>   | uc003vlm.3 | c.1781_1782del     | p.594_594del   |
| exonic   | <i>POT1</i>   | uc003vlm.3 | c.347delC          | p.P116fs       |
| exonic   | <i>PRDM1</i>  | uc003prd.2 | c.A931C            | p.K311Q        |
| exonic   | <i>PTPN11</i> | uc001ttx.3 | c.T1504C           | p.S502P        |
| exonic   | <i>PTPN11</i> | uc001ttw.1 | c.G181T            | p.D61Y         |
| exonic   | <i>PTPN11</i> | uc001ttw.1 | c.A172T            | p.N58Y         |
| exonic   | <i>RAD21</i>  | uc003yod.3 | c.1156_1161del     | p.386_387del   |
| exonic   | <i>RBI</i>    | uc001vcb.3 | c.G610T            | p.E204X        |
| exonic   | <i>RBI</i>    | uc001vcb.3 | c.21delA           | p.R7fs         |
| exonic   | <i>RBI</i>    | uc001vcb.3 | c.14delC           | p.T5fs         |
| exonic   | <i>RBI</i>    | uc001vcb.3 | c.1472_1473del     | p.491_491del   |
| exonic   | <i>ROBO1</i>  | uc003dqe.2 | c.A4387T           | p.K1463X       |
| exonic   | <i>ROBO1</i>  | uc003dqe.2 | c.C3814T           | p.Q1272X       |
| exonic   | <i>SAMHD1</i> | uc002xgh.2 | c.G348T            | p.K116N        |
| splicing | <i>SAMHD1</i> |            | Chr20:35545124,C>A |                |
| exonic   | <i>SAMHD1</i> | uc002xgh.2 | c.T861A            | p.Y287X        |
| splicing | <i>SAMHD1</i> |            | Chr20:35533766,C>T |                |
| exonic   | <i>SAMHD1</i> | uc002xgh.2 | c.A346T            | p.K116X        |
| splicing | <i>SAMHD1</i> |            | Chr20:35545124,C>T |                |
| exonic   | <i>SAMHD1</i> | uc002xgh.2 | c.453_454insG      | p.G151fs       |
| exonic   | <i>SAMHD1</i> | uc002xgh.2 | c.646_647del       | p.216_216del   |
| exonic   | <i>SAMHD1</i> | uc002xgh.2 | c.16_17insCC       | p.S6fs         |
| exonic   | <i>SAMHD1</i> | uc002xgh.2 | c.646_647del       | p.216_216del   |
| splicing | <i>SETD2</i>  |            | Chr3:47155365,C>G  |                |
| exonic   | <i>SETD2</i>  | uc003cqs.3 | c.T2415A           | p.C805X        |
| exonic   | <i>SETD2</i>  | uc003cqv.3 | c.6299delA         | p.K2100fs      |
| exonic   | <i>SETD2</i>  | uc003cqs.3 | c.3460_3463del     | p.1154_1155del |
| exonic   | <i>SF3B1</i>  | uc002uue.3 | c.G2225A           | p.G742D        |
| exonic   | <i>SF3B1</i>  | uc002uue.3 | c.G2225A           | p.G742D        |
| exonic   | <i>SF3B1</i>  | uc002uue.3 | c.G2225A           | p.G742D        |
| exonic   | <i>SF3B1</i>  | uc002uue.3 | c.G2225A           | p.G742D        |
| exonic   | <i>SF3B1</i>  | uc002uue.3 | c.G2223C           | p.K741N        |
| exonic   | <i>SF3B1</i>  | uc002uue.3 | c.A2222C           | p.K741T        |
| exonic   | <i>SF3B1</i>  | uc002uue.3 | c.G2225A           | p.G742D        |
| exonic   | <i>SF3B1</i>  | uc002uue.3 | c.A2222C           | p.K741T        |
| exonic   | <i>SF3B1</i>  | uc002uue.3 | c.G2225A           | p.G742D        |
| exonic   | <i>SF3B1</i>  | uc002uue.3 | c.G2225A           | p.G742D        |
| exonic   | <i>SF3B1</i>  | uc002uue.3 | c.G2225A           | p.G742D        |
| exonic   | <i>SF3B1</i>  | uc002uue.3 | c.G2225A           | p.G742D        |

|        |              |            |                    |                |
|--------|--------------|------------|--------------------|----------------|
| exonic | <i>SF3B1</i> | uc002uue.3 | c.T2111A           | p.I704N        |
| exonic | <i>SF3B1</i> | uc002uue.3 | c.G2219A           | p.G740E        |
| exonic | <i>SF3B1</i> | uc002uue.3 | c.A2098G           | p.K700E        |
| exonic | <i>SF3B1</i> | uc002uue.3 | c.A2098G           | p.K700E        |
| exonic | <i>SF3B1</i> | uc002uue.3 | c.A2110T           | p.I704F        |
| exonic | <i>SF3B1</i> | uc002uue.3 | c.A2098G           | p.K700E        |
| exonic | <i>SF3B1</i> | uc002uue.3 | c.G1998T           | p.K666N        |
| exonic | <i>SF3B1</i> | uc002uue.3 | c.C1986A           | p.H662Q        |
| exonic | <i>SF3B1</i> | uc002uue.3 | c.C1984G           | p.H662D        |
| exonic | <i>SF3B1</i> | uc002uue.3 | c.G1874A           | p.R625H        |
| exonic | <i>SF3B1</i> | uc002uue.3 | c.A2098G           | p.K700E        |
| exonic | <i>SF3B1</i> | uc002uue.3 | c.A2098G           | p.K700E        |
| exonic | <i>SF3B1</i> | uc002uue.3 | c.A1868G           | p.Y623C        |
| exonic | <i>SF3B1</i> | uc002uue.3 | c.G1866T           | p.E622D        |
| exonic | <i>SF3B1</i> | uc002uue.3 | c.A2098G           | p.K700E        |
| exonic | <i>SF3B1</i> | uc002uue.3 | c.A1997C           | p.K666T        |
| exonic | <i>SF3B1</i> | uc002uue.3 | c.C1873T           | p.R625C        |
| exonic | <i>SF3B1</i> | uc002uue.3 | c.A2681G           | p.D894G        |
| exonic | <i>SF3B1</i> | uc002uue.3 | c.C1986G           | p.H662Q        |
| exonic | <i>SF3B1</i> | uc002uue.3 | c.A2098G           | p.K700E        |
| exonic | <i>SF3B1</i> | uc002uue.3 | c.G1998C           | p.K666N        |
| exonic | <i>SF3B1</i> | uc002uue.3 | c.A2098G           | p.K700E        |
| exonic | <i>SF3B1</i> | uc002uue.3 | c.A2098G           | p.K700E        |
| exonic | <i>SF3B1</i> | uc002uue.3 | c.T2111A           | p.I704N        |
| exonic | <i>SF3B1</i> | uc002uue.3 | c.G2219A           | p.G740E        |
| exonic | <i>SF3B1</i> | uc002uue.3 | c.C1986A           | p.H662Q        |
| exonic | <i>SF3B1</i> | uc002uue.3 | c.C1984G           | p.H662D        |
| exonic | <i>SF3B1</i> | uc002uue.3 | c.A2098G           | p.K700E        |
| exonic | <i>SF3B1</i> | uc002uue.3 | c.G1866T           | p.E622D        |
| exonic | <i>SF3B1</i> | uc002uue.3 | c.A2098G           | p.K700E        |
| exonic | <i>SF3B1</i> | uc002uue.3 | c.A1997C           | p.K666T        |
| exonic | <i>SF3B1</i> | uc002uue.3 | c.G2219A           | p.G740E        |
| exonic | <i>SF3B1</i> | uc002uue.3 | c.A2098G           | p.K700E        |
| exonic | <i>SF3B1</i> | uc002uue.3 | c.A2098G           | p.K700E        |
| exonic | <i>SF3B1</i> | uc002uue.3 | c.A2098G           | p.K700E        |
| exonic | <i>SH2B3</i> | uc001tsf.3 | c.C1386A           | p.Y462X        |
| exonic | <i>SMC5</i>  | uc004ahr.2 | c.C2116T           | p.Q706X        |
| exonic | <i>SMC5</i>  | uc004ahr.2 | c.2066delA         | p.E689fs       |
| exonic | <i>SP140</i> | uc002vql.3 | c.1939delG         | p.G647fs       |
| exonic | <i>SP140</i> | uc002vqk.2 | c.970delG          | p.G324fs       |
| exonic | <i>SP140</i> | uc002vql.3 | c.1316_1317insTAAT | p.D439fs       |
| exonic | <i>SPEN</i>  | uc001axk.1 | c.G6416C           | p.S2139T       |
| exonic | <i>SPEN</i>  | uc001axk.1 | c.C1882T           | p.Q628X        |
| exonic | <i>SPEN</i>  | uc001axk.1 | c.3441_3442del     | p.1147_1148del |
| exonic | <i>SPEN</i>  | uc001axk.1 | c.3552_3553del     | p.1184_1185del |
| exonic | <i>SPEN</i>  | uc001axk.1 | c.3703_3731del     | p.1235_1244del |

|          |             |            |                   |                |
|----------|-------------|------------|-------------------|----------------|
| exonic   | <i>SPEN</i> | uc001axk.1 | c.3973_3977del    | p.1325_1326del |
| exonic   | <i>SPEN</i> | uc001axk.1 | c.6762delG        | p.Q2254fs      |
| exonic   | <i>TET2</i> | uc011cez.2 | c.C4456T          | p.R1486X       |
| exonic   | <i>TET2</i> | uc011cez.2 | c.C2950T          | p.Q984X        |
| exonic   | <i>TET2</i> | uc011cez.2 | c.4532delA        | p.E1511fs      |
| exonic   | <i>TET2</i> | uc011cez.2 | c.3417delT        | p.N1139fs      |
| exonic   | <i>TET2</i> | uc011cez.2 | c.3961delT        | p.F1321fs      |
| exonic   | <i>TET2</i> | uc011cez.2 | c.3961delT        | p.F1321fs      |
| exonic   | <i>TET2</i> | uc011cez.2 | c.4618delG        | p.G1540fs      |
| exonic   | <i>TP53</i> | uc010vug.2 | c.G556A           | p.V186I        |
| exonic   | <i>TP53</i> | uc002gig.1 | c.T695C           | p.I232T        |
| splicing | <i>TP53</i> |            | Chr17:7578370,C>T |                |
| splicing | <i>TP53</i> |            | Chr17:7579311,C>A |                |
| exonic   | <i>TP53</i> | uc002gig.1 | c.C413T           | p.A138V        |
| splicing | <i>TP53</i> |            | Chr17:7579311,C>A |                |
| exonic   | <i>TP53</i> | uc002gih.3 | c.G841A           | p.D281N        |
| exonic   | <i>TP53</i> | uc002gig.1 | c.A641G           | p.H214R        |
| exonic   | <i>TP53</i> | uc002gig.1 | c.T714A           | p.C238X        |
| splicing | <i>TP53</i> |            | Chr17:7579311,C>A |                |
| exonic   | <i>TP53</i> | uc002gig.1 | c.T752G           | p.I251S        |
| exonic   | <i>TP53</i> | uc002gig.1 | c.G542C           | p.R181P        |
| exonic   | <i>TP53</i> | uc002gih.3 | c.C817T           | p.R273C        |
| exonic   | <i>TP53</i> | uc002gih.3 | c.G818C           | p.R273P        |
| splicing | <i>TP53</i> |            | Chr17:7577610,T>C |                |
| exonic   | <i>TP53</i> | uc002gig.1 | c.A659G           | p.Y220C        |
| exonic   | <i>TP53</i> | uc002gig.1 | c.A488C           | p.Y163S        |
| exonic   | <i>TP53</i> | uc002gig.1 | c.A707G           | p.Y236C        |
| exonic   | <i>TP53</i> | uc002gig.1 | c.A701G           | p.Y234C        |
| exonic   | <i>TP53</i> | uc002gig.1 | c.A763T           | p.I255F        |
| exonic   | <i>TP53</i> | uc002gig.1 | c.G646A           | p.V216M        |
| exonic   | <i>TP53</i> | uc002gih.3 | c.G811A           | p.E271K        |
| exonic   | <i>TP53</i> | uc002gig.1 | c.C493T           | p.Q165X        |
| exonic   | <i>TP53</i> | uc002gig.1 | c.A488G           | p.Y163C        |
| exonic   | <i>TP53</i> | uc002gig.1 | c.G427A           | p.V143M        |
| exonic   | <i>TP53</i> | uc002gig.1 | c.G711C           | p.M237I        |
| exonic   | <i>TP53</i> | uc002gig.1 | c.T379A           | p.S127T        |
| exonic   | <i>TP53</i> | uc002gig.1 | c.A704G           | p.N235S        |
| splicing | <i>TP53</i> |            | Chr17:7579310,A>C |                |
| exonic   | <i>TP53</i> | uc002gih.3 | c.A838G           | p.R280G        |
| exonic   | <i>TP53</i> | uc002gih.3 | c.T823C           | p.C275R        |
| exonic   | <i>TP53</i> | uc002gig.1 | c.A736G           | p.M246V        |
| exonic   | <i>TP53</i> | uc002gig.1 | c.G469T           | p.V157F        |
| exonic   | <i>TP53</i> | uc002gih.3 | c.G841C           | p.D281H        |
| exonic   | <i>TP53</i> | uc002gig.1 | c.G527C           | p.C176S        |
| exonic   | <i>TP53</i> | uc002gig.1 | c.A707G           | p.Y236C        |
| exonic   | <i>TP53</i> | uc002gig.1 | c.A707G           | p.Y236C        |



|          |              |            |                   |              |
|----------|--------------|------------|-------------------|--------------|
| exonic   | <i>XPO1</i>  | uc002sbj.3 | c.G1711C          | p.E571Q      |
| exonic   | <i>XPO1</i>  | uc002sbj.3 | c.G1711A          | p.E571K      |
| exonic   | <i>XPO1</i>  | uc002sbj.3 | c.G1711A          | p.E571K      |
| exonic   | <i>XPO1</i>  | uc002sbj.3 | c.G1711A          | p.E571K      |
| exonic   | <i>XPO1</i>  | uc002sbj.3 | c.A1871G          | p.D624G      |
| exonic   | <i>XPO1</i>  | uc002sbj.3 | c.G1711A          | p.E571K      |
| exonic   | <i>XPO1</i>  | uc002sbj.3 | c.G1711A          | p.E571K      |
| exonic   | <i>XPO1</i>  | uc002sbj.3 | c.G1711A          | p.E571K      |
| exonic   | <i>XPO1</i>  | uc002sbj.3 | c.A1712G          | p.E571G      |
| exonic   | <i>XPO1</i>  | uc002sbj.3 | c.G1711A          | p.E571K      |
| exonic   | <i>XPO1</i>  | uc002sbj.3 | c.G1711A          | p.E571K      |
| exonic   | <i>ZMYM3</i> | uc004dzh.2 | c.T261A           | p.Y87X       |
| splicing | <i>ZMYM3</i> |            | ChrX:70467361,C>T |              |
| exonic   | <i>ZMYM3</i> | uc004dzh.2 | c.C964T           | p.Q322X      |
| exonic   | <i>ZMYM3</i> | uc004dzh.2 | c.C581A           | p.S194X      |
| exonic   | <i>ZMYM3</i> | uc004dzh.2 | c.1700_1701insT   | p.Y567fs     |
| exonic   | <i>ZMYM3</i> | uc004dzh.2 | c.3660delT        | p.F1220fs    |
| exonic   | <i>ZMYM3</i> | uc004dzh.2 | c.1538_1539del    | p.513_513del |
| splicing | <i>ZRSR2</i> |            | ChrX:15822233,G>C |              |
| exonic   | <i>ZRSR2</i> | uc004cxg.4 | c.C868T           | p.R290X      |
| splicing | <i>ZRSR2</i> |            | ChrX:15836766,G>A |              |

**Table S4.** Likelihood of overall response according to therapy received, previous treatment status and FISH/mutational abnormalities

|                          | Lenalidomide Monotherapy |                     |              |                     |                     |              | Lenalidomide Combination Therapy |                     |              |                     |                    |              |
|--------------------------|--------------------------|---------------------|--------------|---------------------|---------------------|--------------|----------------------------------|---------------------|--------------|---------------------|--------------------|--------------|
|                          | Treatment-naïve          |                     |              | Relapsed/Refractory |                     |              | Treatment-naïve                  |                     |              | Relapsed/Refractory |                    |              |
|                          | OR                       | 95% CI              | p            | OR                  | 95% CI              | p            | OR                               | 95% CI              | p            | OR                  | 95% CI             | p            |
| <b>Del(17p)</b>          | <b>0.118</b>             | <b>0.012-1.126</b>  | <b>0.070</b> | <b>0.172</b>        | <b>0.008-3.618</b>  | <b>0.251</b> | <b>0.333</b>                     | <b>0.012-8.995</b>  | <b>1.000</b> | <b>0.308</b>        | <b>0.125-0.760</b> | <b>0.014</b> |
| <b>Del(11q)</b>          | <b>0.347</b>             | <b>0.089-1.351</b>  | <b>0.179</b> | <b>0.833</b>        | <b>0.203-3.422</b>  | <b>1.000</b> | <b>0.062</b>                     | <b>0.003-1.414</b>  | <b>0.067</b> | <b>0.660</b>        | <b>0.280-1.553</b> | <b>0.374</b> |
| <b>Tri(12)</b>           | <b>0.722</b>             | <b>0.173-3.019</b>  | <b>0.724</b> | <b>1.600</b>        | <b>0.325-7.888</b>  | <b>0.689</b> | <b>2.273</b>                     | <b>0.101-50.911</b> | <b>1.000</b> | <b>0.680</b>        | <b>0.245-1.891</b> | <b>0.586</b> |
| <b>Del(13p)</b>          | <b>1.829</b>             | <b>0.505-6.615</b>  | <b>0.515</b> | <b>1.100</b>        | <b>0.284-4.256</b>  | <b>1.000</b> | <b>0.172</b>                     | <b>0.008-3.818</b>  | <b>0.232</b> | <b>0.700</b>        | <b>0.301-1.628</b> | <b>0.529</b> |
| <b>TP53</b>              | <b>0.159</b>             | <b>0.016-1.573</b>  | <b>0.150</b> | <b>0.059</b>        | <b>0.003-1.121</b>  | <b>0.012</b> | <b>0.432</b>                     | <b>0.017-10.888</b> | <b>1.000</b> | <b>0.260</b>        | <b>0.101-0.675</b> | <b>0.008</b> |
| <b>Complex Karyotype</b> | <b>2.571</b>             | <b>0.235-28.089</b> | <b>0.613</b> | <b>0.667</b>        | <b>0.106-4.182</b>  | <b>1.000</b> | <b>0.094</b>                     | <b>0.005-1.909</b>  | <b>0.207</b> | <b>0.255</b>        | <b>0.094-0.692</b> | <b>0.009</b> |
| <b>ATM</b>               | <b>0.140</b>             | <b>0.006-3.120</b>  | <b>0.187</b> | <b>0.410</b>        | <b>0.016-10.692</b> | <b>1.000</b> | <b>1.479</b>                     | <b>0.069-31.733</b> | <b>1.000</b> | <b>1.476</b>        | <b>0.292-7.461</b> | <b>1.000</b> |
| <b>KRAS</b>              | <b>0.248</b>             | <b>0.010-6.465</b>  | <b>0.439</b> | <b>1.286</b>        | <b>0.024-68.082</b> | <b>1.000</b> | <b>0.020</b>                     | <b>0.001-0.615</b>  | <b>0.067</b> | <b>0.258</b>        | <b>0.041-1.610</b> | <b>0.147</b> |
| <b>MGA</b>               | <b>2.467</b>             | <b>0.095-64.203</b> | <b>1.000</b> | <b>0.234</b>        | <b>0.011-5.214</b>  | <b>0.495</b> | <b>0.432</b>                     | <b>0.017-10.888</b> | <b>1.000</b> | <b>0.221</b>        | <b>0.050-0.977</b> | <b>0.046</b> |
| <b>SF3B1</b>             | <b>2.222</b>             | <b>0.377-13.082</b> | <b>0.438</b> | <b>0.134</b>        | <b>0.015-1.221</b>  | <b>0.106</b> | <b>1.479</b>                     | <b>0.069-31.733</b> | <b>1.000</b> | <b>0.536</b>        | <b>0.187-1.536</b> | <b>0.260</b> |
| <b>DDX3X</b>             | <b>0.787</b>             | <b>0.015-41.586</b> | <b>1.000</b> | <b>0.234</b>        | <b>0.011-5.214</b>  | <b>0.495</b> | <b>0.082</b>                     | <b>0.001-4.816</b>  | <b>1.000</b> | <b>0.041</b>        | <b>0.002-0.785</b> | <b>0.006</b> |



**Figure S1.** Box plot of the mutational burden comparing unmutated IGHV to mutated IGHV patients.

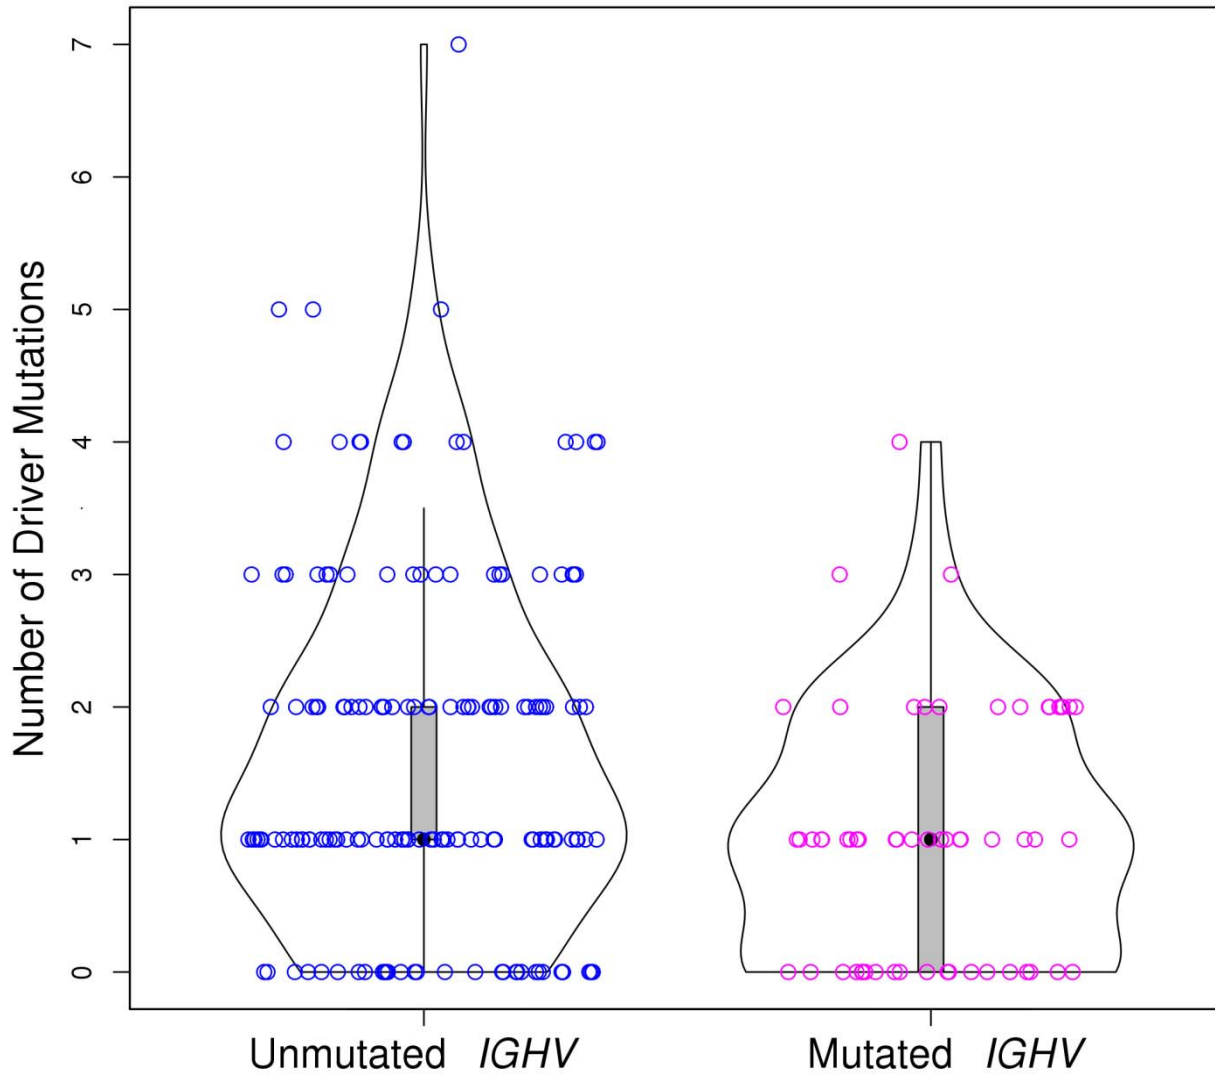

**Figure S2.** Concordance between FISH results and ploidy estimations from copy number predictions within our analysis.

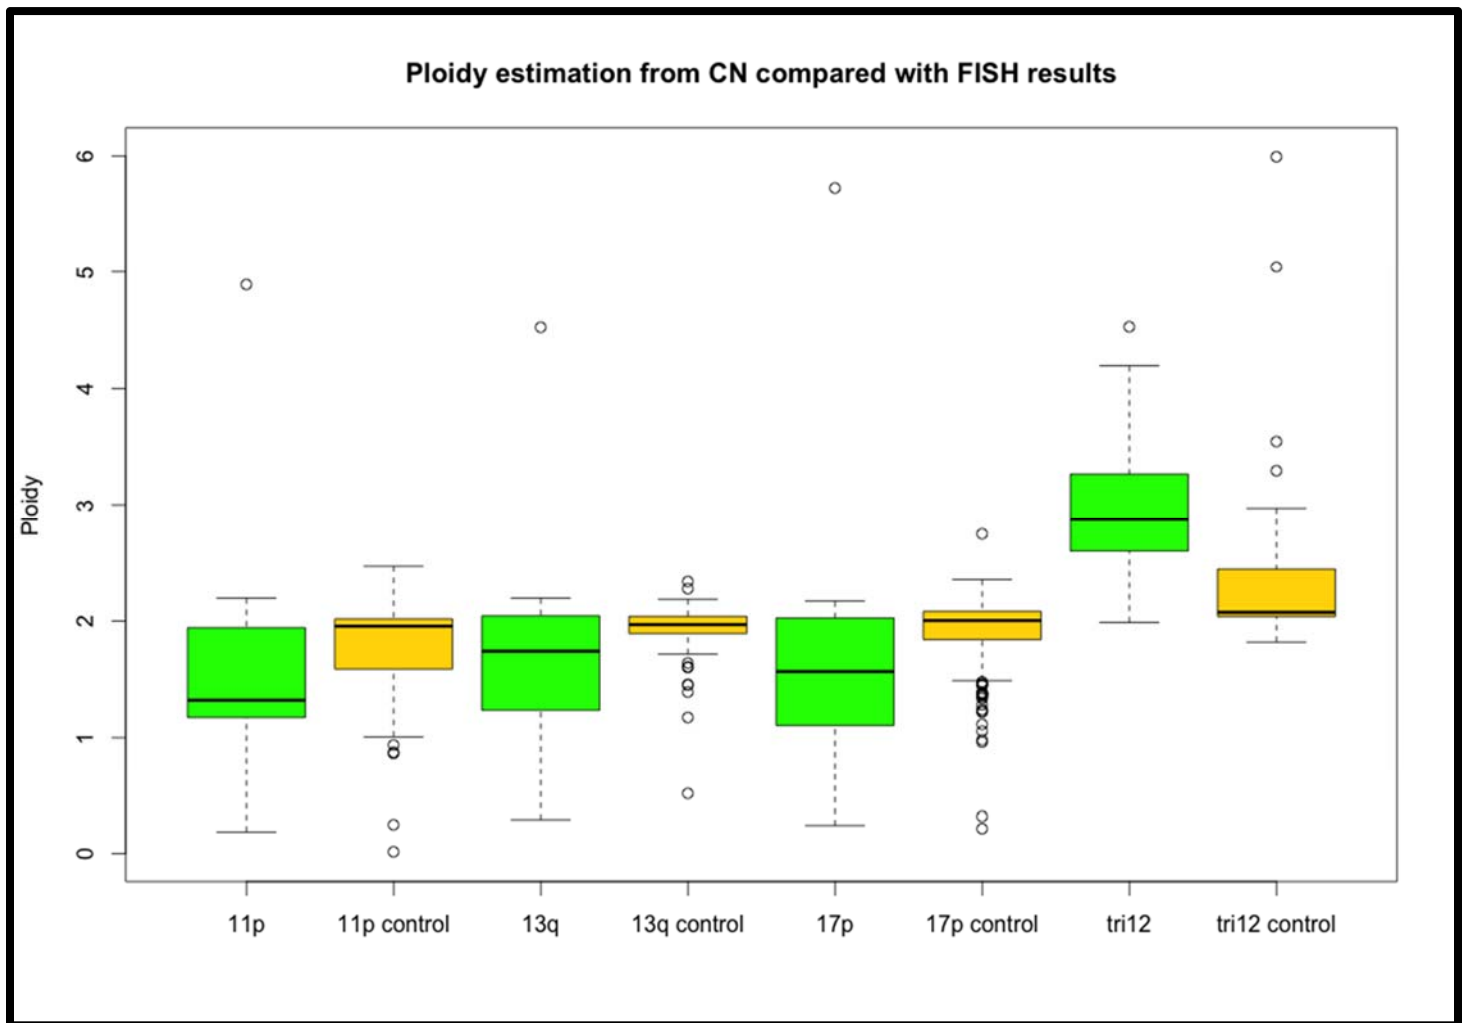

## Supplemental References

1. Zhang, J., et al., *Intratumor heterogeneity in localized lung adenocarcinomas delineated by multiregion sequencing*. *Science*, 2014. **346**(6206): p. 256-9.
2. Li, H., et al., *The Sequence Alignment/Map format and SAMtools*. *Bioinformatics*, 2009. **25**(16): p. 2078-9.
3. Cibulskis, K., et al., *Sensitive detection of somatic point mutations in impure and heterogeneous cancer samples*. *Nat Biotechnol*, 2013. **31**(3): p. 213-9.
4. Ye, K., et al., *Pindel: a pattern growth approach to detect break points of large deletions and medium sized insertions from paired-end short reads*. *Bioinformatics*, 2009. **25**(21): p. 2865-71.
5. Papaemmanuil, E., et al., *Clinical and biological implications of driver mutations in myelodysplastic syndromes*. *Blood*, 2013. **122**(22): p. 3616-27; quiz 3699.
